# Supplementary material for: What is known about the role of external facilitators during the implementation of complex interventions in healthcare settings? A scoping review
Source: HighWire-hosted journal article supplement (doi:10.1136/bmjopen-2024-084883), 2024-06-01
Supplement: bmjopen-2024-084883supp001_data_supplement.pdf [file bmjopen-2024-084883supp001_data_supplement.pdf]

Appendix 1: Search strategy

| Source                                        | Search strategy                                                                                                                                                                                                                                                                                                                                                                                                                                                                                                          | Results |
|-----------------------------------------------|--------------------------------------------------------------------------------------------------------------------------------------------------------------------------------------------------------------------------------------------------------------------------------------------------------------------------------------------------------------------------------------------------------------------------------------------------------------------------------------------------------------------------|---------|
| MEDLINE<br>Date of search: 2023-12-22         | ((TI (Facilitat* OR "Knowledge broker*" OR "Practice enhancement assistant*" OR "Change agent*" OR "coach*") OR AB (Facilitat* OR "Knowledge broker*" OR "Practice enhancement assistant*" OR "Change agent*" OR "coach*")) OR ((MH "Social Facilitation")))<br>AND ((TI ((Complex N2 intervention*) OR (health* N2 Innovation*) OR (organi?ation* N2 innovation*)) OR AB ((Complex N2 intervention*) OR (health* N2 Innovation*) OR (organi?ation* N2 innovation*))) OR ((MH "Organizational Innovation")))             | 2 756   |
| CINAHL<br>Date of search: 2023-12-22          | (TI (Facilitat* OR ("Knowledge broker*" OR " AND Practice AND enhancement AND assistant* AND " OR " AND Change AND agent* AND " OR " AND Coach* AND ") OR AB (Facilitat* OR " AND Knowledge AND broker*)) OR "Practice enhancement assistant*" OR "Change agent*" OR "Coach*")<br>AND ((TI ((Complex N2 intervention*) OR (health* N2 Innovation*) OR (organi?ation* N2 innovation*)) OR AB ((Complex N2 intervention*) OR (health* N2 Innovation*) OR (organi?ation* N2 innovation*))) OR (MH "Organizational Change")) | 1 558   |
| APA PsycINFO<br>Date of search: 2023-12-22    | (TI (Facilitat* OR "Knowledge broker*" OR "Practice enhancement assistant*" OR "Change agent*" OR "coach*") OR AB (Facilitat* OR ("Knowledge broker*" OR " AND Practice AND enhancement AND assistant* AND " OR " AND Change AND agent* AND " OR " AND coach*"))<br>AND ((TI ((Complex N2 intervention*) OR (health* N2 Innovation*) OR (organi?ation* N2 innovation*)) OR AB ((Complex N2 intervention*) OR (health* N2 Innovation*) OR (organi?ation* N2 innovation*))) OR (MA "Innovation"))                          | 939     |
| Embase (Scopus)<br>Date of search: 2023-12-22 | (TITLE-ABS-KEY ((complex W/2 intervention*) OR (health W/2 innovation*)) AND TITLE-ABS-KEY (facilitat*)) AND NOT INDEX (medline)                                                                                                                                                                                                                                                                                                                                                                                         | 652     |

|                                                        |                                                                                                                                                                                                                                                                                                                                                                                                                                                        |      |
|--------------------------------------------------------|--------------------------------------------------------------------------------------------------------------------------------------------------------------------------------------------------------------------------------------------------------------------------------------------------------------------------------------------------------------------------------------------------------------------------------------------------------|------|
| Academic Search Complete<br>Date of search: 2023-12-22 | ((TI (Facilitat* OR "Knowledge broker*" OR "Practice enhancement assistant*" OR "Change agent*" OR "coach*") OR AB (Facilitat* OR "Knowledge broker*" OR "Practice enhancement assistant*" OR "Change agent*" OR "coach*")) OR (DE Facilitators)) AND (TI ((Complex N2 intervention*) OR (health* N2 Innovation*) OR (organi?ation* N2 innovation*)) OR AB ((Complex N2 intervention*) OR (health* N2 Innovation*) OR (organi?ation* N2 innovation*))) | 1074 |
| Business Source Complete<br>Date of search: 2023-12-22 | (TI (Facilitat* OR "Knowledge broker*" OR "Practice enhancement assistant*" OR "Change agent*" OR "coach*") OR AB (Facilitat* OR "Knowledge broker*" OR "Practice enhancement assistant*" OR "Change agent*" OR "coach*")) AND (TI ((Complex N2 intervention*) OR (health* N2 Innovation*) OR (organi?ation* N2 innovation*)) OR AB ((Complex N2 intervention*) OR (health* N2 Innovation*) OR (organi?ation* N2 innovation*)))                        | 588  |
| SocINDEX<br>Date of search: 2023-12-22                 | (TI (Facilitat* OR "Knowledge broker*" OR "Practice enhancement assistant*" OR "Change agent*" OR "coach*") OR AB (Facilitat* OR "Knowledge broker*" OR "Practice enhancement assistant*" OR "Change agent*" OR "coach*")) AND (TI ((Complex N2 intervention*) OR (health* N2 Innovation*) OR (organi?ation* N2 innovation*)) OR AB ((Complex N2 intervention*) OR (health* N2 Innovation*) OR (organi?ation* N2 innovation*)))                        | 107  |

Table 1. Study and Complex Interventions Characteristics

| Study         |             |                                                                                                                                                                                                                                                                                                                                   |                                                                                  | Complex intervention (CI)                                                                                                                      |                                                                                                                                                                                                                                                                       |                                                                                 |                                                                                                                                                                               |
|---------------|-------------|-----------------------------------------------------------------------------------------------------------------------------------------------------------------------------------------------------------------------------------------------------------------------------------------------------------------------------------|----------------------------------------------------------------------------------|------------------------------------------------------------------------------------------------------------------------------------------------|-----------------------------------------------------------------------------------------------------------------------------------------------------------------------------------------------------------------------------------------------------------------------|---------------------------------------------------------------------------------|-------------------------------------------------------------------------------------------------------------------------------------------------------------------------------|
| Author date   | Country     | Study Aim/objective                                                                                                                                                                                                                                                                                                               | Study design                                                                     | CI Name                                                                                                                                        | CI Aim                                                                                                                                                                                                                                                                | Target population                                                               | Providers                                                                                                                                                                     |
| Allen 2019    | Canada      | ‘to gain a cross-site understanding about the state of CO-OP adoption since the end of the KT support’<br><br>‘to develop recommendations from the perspective of allied health knowledge users, working in interprofessional teams, to facilitate implementation of a complex, collaborative intervention that incorporates SDM’ | <b>Process Evaluation</b> – Qualitative research                                 | Cognitive Orientation to daily Occupational Performance (CO-OP)                                                                                | ‘CO-OP is an effective, cognitive strategy-based treatment approach that aligns with Canadian Stroke Best Practice Recommendations. [...] a person-centered, collaborative approach wherein the patients' self-selected functional goals are the focus of treatment.’ | Patients with cognitive impairments following a stroke                          | Interprofessional care team working in inpatient rehabilitation hospital stroke units                                                                                         |
| Bareil 2015   | Canada      | ‘The goal of this participatory action research study was to better understand the driving forces during the early stage of the implementation process of a community-driven and patient-focused program in primary care titled ‘TRANSforming InTerprofessional cardiovascular disease prevention in primary care’ (TRANSIT)      | <b>Process Evaluation</b> - Qualitative research (Participatory action research) | The TRANSIT program                                                                                                                            | ‘Implementing interprofessional collaborative practices in primary care to improve cardiovascular disease (CVD) prevention in patients with multimorbid chronic diseases.’                                                                                            | Patients with multimorbid chronic diseases                                      | Primary healthcare teams working with patients suffering from multi-morbid chronic diseases (family physicians, nurses care manager, nutritionist, pharmacist, kinesiologist) |
| Basinska 2022 | Switzerland | “To evaluate the implementation of three intervention elements from the intervention users’ perspective across 11 NHs.”                                                                                                                                                                                                           | <b>Process Evaluation</b><br>Convergent mixed methods                            | 1. The STOP&WATCH<br><br>2. ISBAR (Introduction, Situation, Background, Assessment, Recommendation)<br><br>3. INTERCARE nurse (coaching nurse) | Reduce unplanned hospitalizations from Swiss nursing homes.                                                                                                                                                                                                           | Nursing Homes Residents and Care workers (Registered nurses, licensed practical | Registered nurses, licensed practical nurses, and nurse aids                                                                                                                  |

| Study         |         |                                                                                                                                                                                                                                                                                                                                                                                                                                                       |                                                                    | Complex intervention (CI)                    |                                                                                                                                                                                                                                                                                                      |                                                  |                                                                                                                              |
|---------------|---------|-------------------------------------------------------------------------------------------------------------------------------------------------------------------------------------------------------------------------------------------------------------------------------------------------------------------------------------------------------------------------------------------------------------------------------------------------------|--------------------------------------------------------------------|----------------------------------------------|------------------------------------------------------------------------------------------------------------------------------------------------------------------------------------------------------------------------------------------------------------------------------------------------------|--------------------------------------------------|------------------------------------------------------------------------------------------------------------------------------|
| Author date   | Country | Study Aim/objective                                                                                                                                                                                                                                                                                                                                                                                                                                   | Study design                                                       | CI Name                                      | CI Aim                                                                                                                                                                                                                                                                                               | Target population                                | Providers                                                                                                                    |
| Beighton 2015 | UK      | ‘The aim of this paper is to provide an additional layer of evaluation by exploring the views of the practice nurses, focusing upon the perceived enablers and barriers to delivering the complex physical activity (PA) interventions, identifying the benefits they gained as practitioners from participating in the trial and their evaluation of the acceptability of the intervention for use within routine PA consultations in a GP setting.’ | <b>Process Evaluation</b> - Qualitative research embedded in a RCT | PACE-Lift and PACE-UP                        | PACE-Lift: ‘To determine if an intervention based on pedometer and accelerometer feedback combined with practice nurse PA consultations in primary care is effective in helping people aged 60–74 years to increase their PA levels over a 3 month period and to maintain any increase over a year.’ | Inactive patients<br><br>nurses, and nurse aids) | Practice Nurses                                                                                                              |
|               |         |                                                                                                                                                                                                                                                                                                                                                                                                                                                       |                                                                    |                                              | PACE-UP: ‘To determine whether inactive patients aged 45–74 years can increase their PA by being given a pedometer with a diary and written guidelines and whether additional individual, tailored, support from a practice nurse increases any benefits over a 3 month period. [...]’               |                                                  |                                                                                                                              |
| Berry 2021    | UK      | ‘[...] we describe our experiences as researchers in overseeing the delivery of a complex intervention within a pragmatic RCT. In describing our experiences, we aim to highlight to other researchers the challenges that                                                                                                                                                                                                                            | <b>Process Evaluation</b> - Qualitative research embedded in a RCT | The Journeying through Dementia intervention | ‘[...] to promote independence, self-efficacy, and continued participation in life by people with mild dementia. It involved 12 weekly, 2h facilitated groups                                                                                                                                        | Patients living with mild dementia               | ‘Staff within the local services, who delivers intervention in the community (either healthcare support workers or assistant |

| Study       |               |                                                                                                                                                                                                                                                                                                                               |                                                                    | Complex intervention (CI)            |                                                                                                                                                                                                                                                                                                                |                                        |                                                                                                                                                                            |
|-------------|---------------|-------------------------------------------------------------------------------------------------------------------------------------------------------------------------------------------------------------------------------------------------------------------------------------------------------------------------------|--------------------------------------------------------------------|--------------------------------------|----------------------------------------------------------------------------------------------------------------------------------------------------------------------------------------------------------------------------------------------------------------------------------------------------------------|----------------------------------------|----------------------------------------------------------------------------------------------------------------------------------------------------------------------------|
| Author date | Country       | Study Aim/objective                                                                                                                                                                                                                                                                                                           | Study design                                                       | CI Name                              | CI Aim                                                                                                                                                                                                                                                                                                         | Target population                      | Providers                                                                                                                                                                  |
|             |               | can present in implementing and evaluating complex interventions within the context of pragmatic RCTs’                                                                                                                                                                                                                        |                                                                    |                                      | with 8–12 participants with dementia delivered in a community venue as well as four one-to-one sessions ideally with the same facilitator for individual goal setting [...]                                                                                                                                    |                                        | psychologists who were not registered health or social care professionals)’                                                                                                |
| Bird 2020   | Canada        | ‘[...] to evaluate implementation fidelity of a complex multi-component community-based exercise program using a framework adapted from the Template for Intervention Description and Replication (TIDier) checklist that we embedded in a training program built on the TIDier framework when we ran it for the first time.’ | <b>Process Evaluation</b> - Mixed methods                          | Fitness and Mobility Exercise (FAME) | ‘The FAME exercise program is a community-based circuit style exercise program for stroke, which has established efficacy. It consists of warm up, exercise stations to improve balance, functional strength and fitness, followed by a cool down stretch session and it's given here to people after stroke.’ | Patients after stroke                  | Fitness instructor                                                                                                                                                         |
| Byng 2008   | UK            | ‘This paper builds a picture of how the intervention, as a whole, had its effects and how the process evaluation adds meaning to the results of the trial’                                                                                                                                                                    | <b>Process Evaluation</b> -Mixed methods embedded in a RCT         | The Mental Health Link intervention  | ‘[...] to improve the care of patients with long-term mental illness (LTMI), looked after by family doctors (general practitioners) working in primary health care teams (PHCTs) and community mental health workers working in community mental health teams (CMHTs).                                         | Patients with long-term mental illness | ‘Family doctors (general practitioners) working in primary health care teams (PHCTs) and community mental health workers working in community mental health teams (CMHTs)’ |
| Cannon 2019 | United States | ‘This paper describes the influence of an implementation support intervention—Getting to Outcomes (GTO)— on a wide range of implementation barriers and facilitators in a RCT                                                                                                                                                 | <b>Process Evaluation</b> – Qualitative research embedded in a RCT | CHOICE program                       | Substance use prevention program run in low-resource community-based settings (boys and girls club).                                                                                                                                                                                                           | Middle-school youth                    | Community-based practitioners (Boys & Girls Club – nonprofit organization)                                                                                                 |

| Study         |                                  |                                                                                                                                                                                                                                                                                                                                                                                                                                                                                                                                                                                                                                               |                                                                                       | Complex intervention (CI)                                   |                                                                                                                                                                                                                                                                                                                     |                                                   |                                                                                       |
|---------------|----------------------------------|-----------------------------------------------------------------------------------------------------------------------------------------------------------------------------------------------------------------------------------------------------------------------------------------------------------------------------------------------------------------------------------------------------------------------------------------------------------------------------------------------------------------------------------------------------------------------------------------------------------------------------------------------|---------------------------------------------------------------------------------------|-------------------------------------------------------------|---------------------------------------------------------------------------------------------------------------------------------------------------------------------------------------------------------------------------------------------------------------------------------------------------------------------|---------------------------------------------------|---------------------------------------------------------------------------------------|
| Author date   | Country                          | Study Aim/objective                                                                                                                                                                                                                                                                                                                                                                                                                                                                                                                                                                                                                           | Study design                                                                          | CI Name                                                     | CI Aim                                                                                                                                                                                                                                                                                                              | Target population                                 | Providers                                                                             |
| Chlan 2021    | United States                    | <p>in low-resourced, community-based settings that are responsible for delivering an evidence-based program to prevent substance use.’</p> <p>‘[...] to describe: (1) the iterative development and implementation of protocols for intervention fidelity monitoring, (2) pilot testing of the fidelity monitoring plan, (3) the identification of interventionist training deficiencies, and (4) opportunities to enhance protocol rigor for a cancer symptom management intervention delivered through the electronic health record (EHR) patient portal and telephone as part of a complex, multi-component pragmatic clinical trial.’</p> | <p><b>Process and Outcome Evaluation</b> –</p> <p>Mixed methods embedded in a RCT</p> | E2C2 intervention                                           | <p>The intervention is a remotely delivered cancer symptom monitoring and management system.</p> <p>‘The intervention focuses on symptoms that are common among individuals with cancer including sleep disturbance, pain, anxiety, depression, and low energy (fatigue) (SPADE) as well as physical function.’</p> | Citizen living with cancer or survivors of cancer | Registered nurse symptom care manager (RN SCM)                                        |
| Christie 2020 | Netherlands, Germany and Belgium | ‘The specific objectives of this study were to (1) formulate evidence-based implementation strategies, (2) develop a sustainable business model, and (3) integrate these elements into an implementation plan.’                                                                                                                                                                                                                                                                                                                                                                                                                               | <b>Developmental Study</b> – (Case control study)                                     | Partner in Balance (An evidence-based eHealth intervention) | ‘Partner in Balance is a web-based tool to support the caregivers of people with dementia at home, which is applied in a ‘blended’ 8-week eHealth intervention’                                                                                                                                                     | Caregivers of people with dementia                | Coaches from health care organizations (e.g., dementia case management organizations) |
| Clarke 2013   | UK                               | ‘[...] examine how the intervention was implemented to effect practice change within stroke unit environments, how practitioners were engaged in the work of delivering the LSCTC, and how they in-involved caregivers in the program.’                                                                                                                                                                                                                                                                                                                                                                                                       | <p><b>Process Evaluation</b> –</p> <p>Qualitative research embedded in a RCT</p>      | London Stroke Training Course (LSCTC)                       | The intervention—a training program targeted at caregivers of stroke survivors, [...] was intended to be delivered by MDT members within stroke units to secure positive outcomes for patients and their caregivers. It was expected that caregiver training will                                                   | Caregivers of stroke survivors                    | Multidisciplinary Teams (Stroke Units)                                                |

| Study         |               |                                                                                                                                                                                                                                                                                                                                                                        |                                                                                       | Complex intervention (CI)                   |                                                                                                                                                                                                                                                                                                                                                                                                                                                                |                                       |                                                             |
|---------------|---------------|------------------------------------------------------------------------------------------------------------------------------------------------------------------------------------------------------------------------------------------------------------------------------------------------------------------------------------------------------------------------|---------------------------------------------------------------------------------------|---------------------------------------------|----------------------------------------------------------------------------------------------------------------------------------------------------------------------------------------------------------------------------------------------------------------------------------------------------------------------------------------------------------------------------------------------------------------------------------------------------------------|---------------------------------------|-------------------------------------------------------------|
| Author date   | Country       | Study Aim/objective                                                                                                                                                                                                                                                                                                                                                    | Study design                                                                          | CI Name                                     | CI Aim                                                                                                                                                                                                                                                                                                                                                                                                                                                         | Target population                     | Providers                                                   |
| Connolly 2020 | United States | ‘1) examine internal facilitator’s (IF) use of i-PARIHS facilitation skills, from the external facilitator’s (EF) perspectives; 2) identify additional attributes of IFs not encompassed within i-PARIHS skills; and 3) investigate the relative contributions of IFs and EFs during implementation, to better understand sustainability of implementation processes.’ | <b>Process Evaluation</b> – Qualitative research embedded in a trial                  | Collaborative Chronic care model (CCM)      | contribute to the work of rehabilitation.’<br>The CCM is an evidence-based approach to structuring care for chronic conditions including mental health disorders                                                                                                                                                                                                                                                                                               | Patients with mental health disorders | Interdisciplinary teams within general mental health clinic |
| Craig 2017    | Australia     | ‘[...] To describe the development of an implementation intervention for the T3 Trial (Triage, Treatment and Transfer of patients with stroke in emergency departments (EDs) using theory to recommend behavior change techniques (BCTs) and drawing on the research evidence base and practical issues of feasibility and acceptability.’                             | <b>Developmental Study</b><br>‘A stepped method for developing complex interventions’ | T3 trial clinical intervention              | A care bundle of clinical protocols for Triage, Treatment and Transfer of patients with stroke in emergency departments (EDs)<br><br>‘The T3Trial is a prospective, multi-centre, parallel group, blinded, cluster randomised trial that aimed to evaluate the effectiveness of an implementation intervention to improve the triage, treatment and transfer of stroke patients from ED to stroke units on 90-day outcomes and in-hospital processes of care.’ | Patients with stroke                  | Healthcare professionals working in Emergency Department    |
| Craven 2021   | UK            | This study aimed to explore mentors’ roles in supporting OTs (Occupational therapists) with intervention delivery and fidelity, and to describe factors                                                                                                                                                                                                                | <b>Process Evaluation-</b>                                                            | RE-Turn to work After stroKE (RETAKE) Trial | The RETAKE trial aims to determine whether providing early stroke-specialist vocational rehabilitation plus                                                                                                                                                                                                                                                                                                                                                    | Patients after stroke                 | Occupational therapists                                     |

| Study       |                                         |                                                                                                                                                                                                                                                                                                                            |                                                                                             | Complex intervention (CI)                                              |                                                                                                                                                                                                                                                               |                                                                                                                                                                                                                                     |                                                                                                                                                                       |
|-------------|-----------------------------------------|----------------------------------------------------------------------------------------------------------------------------------------------------------------------------------------------------------------------------------------------------------------------------------------------------------------------------|---------------------------------------------------------------------------------------------|------------------------------------------------------------------------|---------------------------------------------------------------------------------------------------------------------------------------------------------------------------------------------------------------------------------------------------------------|-------------------------------------------------------------------------------------------------------------------------------------------------------------------------------------------------------------------------------------|-----------------------------------------------------------------------------------------------------------------------------------------------------------------------|
| Author date | Country                                 | Study Aim/objective                                                                                                                                                                                                                                                                                                        | Study design                                                                                | CI Name                                                                | CI Aim                                                                                                                                                                                                                                                        | Target population                                                                                                                                                                                                                   | Providers                                                                                                                                                             |
|             |                                         | affecting the mentoring process and intervention delivery of a complex vocational rehabilitation (VR) intervention to stroke survivors.                                                                                                                                                                                    | Mixed methods embedded in a RCT                                                             |                                                                        | usual NHS (National Health Service) rehabilitation is more clinically and cost-effective for supporting post-stroke return to work than usual care (UC) alone’                                                                                                |                                                                                                                                                                                                                                     |                                                                                                                                                                       |
| Damush 2021 | United States                           | ‘The specific aim of this evaluation was to examine the effect of the implementation strategy bundle on implementation success. We hypothesized that clinical teams which en-gaged in the implementation strategies and locally adapted the PREVENT program components would realize the greatest implementation success.’ | <b>Outcome Evaluation</b> – Stepped-wedge implementation trial evaluated with mixed methods | PREVENT                                                                | ‘The Protocol guided Rapid Evaluation of Veterans Experiencing New Transient Neurologic Symptoms (PREVENT) program was designed to address systemic barriers to providing timely guideline-concordant care for patients with transient ischemic attack (TIA)’ | Veterans Experiencing New Transient Neurologic Symptoms / patients with transient ischemic attack (TIA)                                                                                                                             | Health professionals’ teams working with veteran’s patients experiencing new transient neurological symptoms in emergency department                                  |
| Diffin 2018 | UK                                      | ‘to explore, at scale, the process of implementation of the CSNAT intervention for carers in routine practice’                                                                                                                                                                                                             | <b>Process Evaluation</b> – Qualitative research                                            | The Carer Support Needs Assessment Tool (CSNAT)                        | The Carer Support Needs Assessment Tool (CSNAT) intervention, a person-centered process of carer assessment and support                                                                                                                                       | Informal (Friends, Family) carers within palliative careas nurse, social worker, occupational therapists, etc.)                                                                                                                     | CSNAT Champions (practitioners from palliative/end of life care organizations such as care organizations such as nurse, social worker, occupational therapists, etc.) |
| Harris 2013 | Germany, Hungary, Ireland, and Portugal | ‘1. To identify the organizational and partnership structures which underpin early implementation activity.<br>2. Explore the mechanisms of engagement that promote active participation and collaboration in early phases of implementation.’                                                                             | <b>Process Evaluation</b> – Qualitative research                                            | Optimized Suicide Prevention and Implementation in Europe: OSPI-Europe | ‘OSPI implemented five levels of suicide prevention interventions in Germany, Hungary, Ireland and Portugal, with a control and intervention site in each country.’                                                                                           | Citizen at risk1) of depression working in community or suicide andsettings who may come into contact with their families depressed and/or suicidal persons "such as teachers, members of the police force, social workers, etc."); |                                                                                                                                                                       |



| Study              |         |                                                                                                                                                                                                                   |                                                                    | Complex intervention (CI)                                                                     |                                                                                                                                                                                                                                               |                                                                                          |                                                                                                                               |
|--------------------|---------|-------------------------------------------------------------------------------------------------------------------------------------------------------------------------------------------------------------------|--------------------------------------------------------------------|-----------------------------------------------------------------------------------------------|-----------------------------------------------------------------------------------------------------------------------------------------------------------------------------------------------------------------------------------------------|------------------------------------------------------------------------------------------|-------------------------------------------------------------------------------------------------------------------------------|
| Author date        | Country | Study Aim/objective                                                                                                                                                                                               | Study design                                                       | CI Name                                                                                       | CI Aim                                                                                                                                                                                                                                        | Target population                                                                        | Providers                                                                                                                     |
| Hockley 2019       | UK      | ‘This paper offers a framework for the cross-cultural development and support necessary to implement a complex palliative care intervention in nursing homes’                                                     | <b>Developmental study</b>                                         | PACE Steps to Success program                                                                 | ‘The PACE Steps to Success program is a complex educational and development intervention to improve palliative care in nursing homes.’                                                                                                        | Staff working in nursing home (nurses and care assistants) and providing palliative care | 2) health professional in primary care.<br>‘Country trainers’ (nurses, physicians, psychologists, social worker, sociologist) |
| Hunt 2021          | Canada  | ‘The aims of the current study were: 1) to gain cross-site understanding about the intervention implementation; and 2) to identify key implementation successes and challenges, and related themes across sites.’ | <b>Process Evaluation</b> – Qualitative research embedded in a RCT | CO-OP approach (the cognitive orientation to daily occupational performance [CO-OP] approach) | ‘[...] an evidence-based, person-centered, metacognitive approach to stroke rehabilitation. The CO-OP approach focuses on the person’s goals and results in improved performance of activities that are most meaningful to them.’             | Patients with stroke                                                                     | Interprofessional care team working in inpatient rehabilitation hospital stroke units                                         |
| Karabukaye va 2022 | USA     | “To identify factors that might prompt organizations to choose different numbers and types of implementation strategies.”                                                                                         | <b>Process evaluation</b> – Mixed methods                          | Share decision making aid (DA)                                                                | “To educate lupus patients about their treatment options and help them engage in more shared decision making with their physicians.”                                                                                                          | Patient with Lupus                                                                       | Rheumatology clinic personnel (e.g. physicians, pharmacists, clinic managers, nurses, medical assistants)                     |
| Kelley 2020        | UK      | ‘[...] to explore what features and actions of managers lend support to complex intervention delivery in care home settings, and what factors affect their ability to offer this support.’                        | <b>Process Evaluation</b> – Qualitative research embedded in a RCT | Dementia Care Mapping™ (DCM)                                                                  | [...] a psychosocial intervention that aims to improve care practices for people living with dementia. It is an observational tool set within a practice development process, to support staff members working in care settings to record and | People living with dementia                                                              | Staff members working with people living with dementia in care home                                                           |

| Study        |         |                                                                                                                                                                                                                                                                                                                                                                                                                                                                                                        |                                                                    | Complex intervention (CI)                                                           |                                                                                                                                                                                                                                                                                                                                                       |                                                       |                                                                                                                                                                               |
|--------------|---------|--------------------------------------------------------------------------------------------------------------------------------------------------------------------------------------------------------------------------------------------------------------------------------------------------------------------------------------------------------------------------------------------------------------------------------------------------------------------------------------------------------|--------------------------------------------------------------------|-------------------------------------------------------------------------------------|-------------------------------------------------------------------------------------------------------------------------------------------------------------------------------------------------------------------------------------------------------------------------------------------------------------------------------------------------------|-------------------------------------------------------|-------------------------------------------------------------------------------------------------------------------------------------------------------------------------------|
| Author date  | Country | Study Aim/objective                                                                                                                                                                                                                                                                                                                                                                                                                                                                                    | Study design                                                       | CI Name                                                                             | CI Aim                                                                                                                                                                                                                                                                                                                                                | Target population                                     | Providers                                                                                                                                                                     |
|              |         |                                                                                                                                                                                                                                                                                                                                                                                                                                                                                                        |                                                                    |                                                                                     | understand experiences of care for people living with dementia, and to use this as a basis for person-centered care planning.'                                                                                                                                                                                                                        |                                                       |                                                                                                                                                                               |
| Leamy 2014   | Canada  | 'To investigate staff and trainer perspectives on the barriers and facilitators to implementing a complex intervention to help staff support the recovery of service users with a primary diagnosis of psychosis in community mental health teams.'                                                                                                                                                                                                                                                    | <b>Process Evaluation</b> – Qualitative research embedded in a RCT | REFOCUS intervention                                                                | 'The 12 month, team-level intervention was delivered to healthcare professionals who all provide care co-ordination (Recovery, Psychosis and Forensic teams). The intervention was designed to change mental healthcare practice from the bottom-up, i.e. at both a practitioner and team level, rather than from a top-down, organisational level. ' | Service users with primary diagnosis of psychosis     | Practitioner and team level in mental health for service users with primary diagnosis of psychosis, in community mental health teams                                          |
| Lessard 2016 | Canada  | 'The overall purpose of this study is to enhance our under-standing of the roles exercised by EFs and IFTs to support practice change implementation in organizational contexts. More specifically, this qualitative research is guided by the following objectives: 1) identifying and analyzing the facilitation roles undertaken by EFs and IFTs during the implementation of TRANSIT 2) examining the dynamics of facilitation between EFs, IFTs, family medicine groups, and other change actors' | <b>Process Evaluation</b> – Qualitative research                   | Transforming Inter professional Cardiovascular Prevention in Primary Care (TRANSIT) | '[...] Improve cardiovascular prevention in primary care patients suffering from multi-morbid chronic disease.'                                                                                                                                                                                                                                       | Patients suffering from multi-morbid chronic diseases | Primary healthcare teams working with patients suffering from multi-morbid chronic diseases (family physicians, nurses care manager, nutritionist, pharmacist, kinesiologist) |

| Study       |               |                                                                                                                                                                                                                                                                                  |                                                                                             | Complex intervention (CI)                                                                                                                                                                                                                                                                         |                                                                                                                                                                                                                                                                                                                                                                                                                                                                                                                                                                                                                                                                                                   |                                                |                                                                                                                        |
|-------------|---------------|----------------------------------------------------------------------------------------------------------------------------------------------------------------------------------------------------------------------------------------------------------------------------------|---------------------------------------------------------------------------------------------|---------------------------------------------------------------------------------------------------------------------------------------------------------------------------------------------------------------------------------------------------------------------------------------------------|---------------------------------------------------------------------------------------------------------------------------------------------------------------------------------------------------------------------------------------------------------------------------------------------------------------------------------------------------------------------------------------------------------------------------------------------------------------------------------------------------------------------------------------------------------------------------------------------------------------------------------------------------------------------------------------------------|------------------------------------------------|------------------------------------------------------------------------------------------------------------------------|
| Author date | Country       | Study Aim/objective                                                                                                                                                                                                                                                              | Study design                                                                                | CI Name                                                                                                                                                                                                                                                                                           | CI Aim                                                                                                                                                                                                                                                                                                                                                                                                                                                                                                                                                                                                                                                                                            | Target population                              | Providers                                                                                                              |
| Ludden 2019 | United States | To compare three dissemination approaches for implementing an asthma shared decision-making (SDM) intervention into primary care practices.                                                                                                                                      | <b>Outcome Evaluation</b> – RCT and a stepped-wedge implementation trial with mixed methods | ‘The facilitator-led approach is an evidence-based implementation method utilizing a 12-week rollout to fully support adoption of the SDM toolkit into practices and ongoing episodic needs-based contact including a refresher session after one year to support continued implementation [...]’ | ‘The primary outcome of the study was patients’ perceptions of having shared in the treatment decision at an asthma visit in the active dissemination arms. Secondary outcomes were health outcomes for patients with asthma, including ED utilization, hospitalizations, oral steroid prescriptions, and one or more of these three “markers” of exacerbation for all three arms [5,8,26–28]. We hypothesized that practices receiving the facilitator-led dissemination approach would have a greater percentage of patients reporting having equally shared in the treatment decision about their asthma care with their provider than patients in the traditional lunch-and-learn practices.’ | Patients with asthma                           | Nonphysician providers, such as nurses or other clinical staff functioning as health coaches in primary care practices |
| Luig 2018   | Canada        | ‘This article uses the example of the ‘5As Team’ randomized control trial to explore implementation strategies to promote knowledge transfer, capacity building, and practice integration, and their interaction within the context of an inter disciplinary primary care team.’ | <b>Process Evaluation</b> – Qualitative research embedded in a RCT                          | 5As Team (5AsT)                                                                                                                                                                                                                                                                                   | ‘[...] to change the behavior of health professionals and the organization of care to improve care for obesity in primary care.’                                                                                                                                                                                                                                                                                                                                                                                                                                                                                                                                                                  | Patients visiting in primary care with obesity | Interdisciplinary primary care team (mental health workers, registered dieticians, registered nurses or practitioners) |

| Study        |               |                                                                                                                                                                                                                                                                                                                                               |                                                                                                                                                        | Complex intervention (CI)                                                         |                                                                                                                                                                                                                                                                                                                                                                                                   |                                                                                                                                                                           |                                                                                                                                                                                                                                                                                                                                                           |
|--------------|---------------|-----------------------------------------------------------------------------------------------------------------------------------------------------------------------------------------------------------------------------------------------------------------------------------------------------------------------------------------------|--------------------------------------------------------------------------------------------------------------------------------------------------------|-----------------------------------------------------------------------------------|---------------------------------------------------------------------------------------------------------------------------------------------------------------------------------------------------------------------------------------------------------------------------------------------------------------------------------------------------------------------------------------------------|---------------------------------------------------------------------------------------------------------------------------------------------------------------------------|-----------------------------------------------------------------------------------------------------------------------------------------------------------------------------------------------------------------------------------------------------------------------------------------------------------------------------------------------------------|
| Author date  | Country       | Study Aim/objective                                                                                                                                                                                                                                                                                                                           | Study design                                                                                                                                           | CI Name                                                                           | CI Aim                                                                                                                                                                                                                                                                                                                                                                                            | Target population                                                                                                                                                         | Providers                                                                                                                                                                                                                                                                                                                                                 |
| Mancini 2009 | United States | '[...] identified barriers and facilitators to the high-fidelity implementation of assertive community treatment.'                                                                                                                                                                                                                            | <b>Process Evaluation</b> – Mixed methods                                                                                                              | Assertive community treatment                                                     | 'The assertive community treat-ment model is specifically designed for persons with severe mental illness who have a recent history of psychi-atric hospitalizations, criminal justice involvement, homelessness, or sub-stance abuse. The model is based on a team approach, a low staff-to-client ratio, and the delivery of a compre-hensive package of services to clients in the community.' | Adults with severe mental illness who have a recent history of psychiatric hospitalizations, criminal justice involvement, homelessness, substance abuse in the community | A group of providers functions as a team, rather than as individual clinicians; team members know and work with all clients assigned to them. The team includes at least a psychiatrist, a nurse, a treatment specialist, and another clinician with experience treating persons with severe mental illness. Their services are provided in the community |
| Mars 2013    | UK            | 'The aim of this study was to (1) demonstrate the development and testing of tools and procedures designed to monitor and assess the integrity of a complex intervention for chronic pain (COping with persistent Pain, Effectiveness Research into Self-management (COPERS) course); and (2) make recommendations based on our experiences.' | <b>Developmental study and process evaluation-Quantitative research</b><br>'Fidelity assessment of a two-arm randomized controlled trial intervention' | Coping with persistent Pain, Effectiveness Research into Self-management (COPERS) | 'It is a self-management course aimed at enabling participants living with long-term musculoskeletal pain to improve the quality of their live.'                                                                                                                                                                                                                                                  | People living with long-term musculoskeletal pain                                                                                                                         | Specifically trained facilitators, one a healthcare professional and another a lay facilitator with experience of living with long-term pain                                                                                                                                                                                                              |
| Mathias 2022 | India         | 'To assess the feasibility, acceptability, and relevance of the Parwarish, a positive parenting intervention adapted                                                                                                                                                                                                                          | <b>Process Evaluation-Mixed methods</b>                                                                                                                | Parwarish                                                                         | 'Parwarish seeks to reduce harsh parenting and violence within families through new                                                                                                                                                                                                                                                                                                               | Parents and adolescents from                                                                                                                                              | 'Pairs of community facilitators with the following criteria for                                                                                                                                                                                                                                                                                          |

| Study          |               |                                                                                                                                                                                                                                                                        |                                                                   | Complex intervention (CI)                          |                                                                                                                                                                                                  |                                                       |                                                                                                                                                                                                                                                                                                                                                                                                                   |
|----------------|---------------|------------------------------------------------------------------------------------------------------------------------------------------------------------------------------------------------------------------------------------------------------------------------|-------------------------------------------------------------------|----------------------------------------------------|--------------------------------------------------------------------------------------------------------------------------------------------------------------------------------------------------|-------------------------------------------------------|-------------------------------------------------------------------------------------------------------------------------------------------------------------------------------------------------------------------------------------------------------------------------------------------------------------------------------------------------------------------------------------------------------------------|
| Author date    | Country       | Study Aim/objective                                                                                                                                                                                                                                                    | Study design                                                      | CI Name                                            | CI Aim                                                                                                                                                                                           | Target population                                     | Providers                                                                                                                                                                                                                                                                                                                                                                                                         |
|                |               | from PLH-Teens in three diverse settings in India.’                                                                                                                                                                                                                    |                                                                   |                                                    | attitudes and skill building between parents and adolescents.’                                                                                                                                   | disadvantage communities                              | facilitation selection: 1) <b>Parents of adolescents</b> who were resident in the target community. 2) Represent an equal mix of genders willing to work as a pair in facilitation (over half of facilitators worked as a married couple). 3) Trusted and accepted as a leader by the community. 4) Effective communicators. 5) Had at least passed class 10th and were fluent in the local dialect or language.’ |
| Novick 2015    | United States | ‘To describe perceived barriers and facilitators to implementing and sustaining Centering Pregnancy Plus (CPp)’                                                                                                                                                        | <b>Process Evaluation-</b> Qualitative research embedded in a RCT | Centering pregnancy Plus (CP+)                     | Aim at producing positive perinatal outcomes with group prenatal care.                                                                                                                           | Pregnant woman and their significant others           | ‘pre-natal health care provider and another staff member (clinician, nurse, medical assistant, or community health worker)’                                                                                                                                                                                                                                                                                       |
| Porcheret 2014 | UK            | ‘Our case study comprises a description of the systematic selection and use of models to inform development of a behaviour change intervention designed to change GP clinical practice during consultations with patients with OA.’ ‘One component of implementing the | <b>Developmental study</b>                                        | Managing Osteoarthritis in Consultations (MOSAICS) | ‘The intervention was an evidence-based service for people who were 45 years or older presenting to the practice with a peripheral joint problem [...], designed to provide: i) relevant written | Adult 45 + living with osteoarthritis (joint problem) | General physicians                                                                                                                                                                                                                                                                                                                                                                                                |

| Study          |         |                                                                                                                                                                                                                                                                                                                    |                                                                                             | Complex intervention (CI)                                                                                |                                                                                                                                                                                                                                                                                                                                                 |                                                               |                                                                                                                                                                                                                 |
|----------------|---------|--------------------------------------------------------------------------------------------------------------------------------------------------------------------------------------------------------------------------------------------------------------------------------------------------------------------|---------------------------------------------------------------------------------------------|----------------------------------------------------------------------------------------------------------|-------------------------------------------------------------------------------------------------------------------------------------------------------------------------------------------------------------------------------------------------------------------------------------------------------------------------------------------------|---------------------------------------------------------------|-----------------------------------------------------------------------------------------------------------------------------------------------------------------------------------------------------------------|
| Author date    | Country | Study Aim/objective                                                                                                                                                                                                                                                                                                | Study design                                                                                | CI Name                                                                                                  | CI Aim                                                                                                                                                                                                                                                                                                                                          | Target population                                             | Providers                                                                                                                                                                                                       |
|                |         | MOSAICS trial intervention was to enhance the consultation behaviour of the GPs delivering the trial intervention. This behaviour concerned diagnosis and initial management in line with the NICE OA Guideline [...]                                                                                              |                                                                                             |                                                                                                          | information for patients, ii) support for patients to undertake muscle strengthening exercises,increase physical activity and, if applicable, lose weight, and iii) advice to patients on the appropriate use of analgesia’                                                                                                                     |                                                               |                                                                                                                                                                                                                 |
| Raphaelis 2020 | Austria | ‘Specific aims of the study were to (1) describe recruitment and characteristics of the target population (Reach); (2) to report on overall effectiveness of the intervention (Effectiveness) and (3) which elements of implementation may play a role on the effectiveness of the intervention (Implementation).’ | <b>Process and Outcome Evaluation</b> - Quantitative research (Randomized controlled trial) | EvANtiPain                                                                                               | ‘Pain self-management support intervention that reduces barriers and thus changes pain self-management-related behavior leading to a reduction of pain interference with daily activities’ (For oncology patients)                                                                                                                              | Patients with cancer-related pain                             | Nurses working in hospital providing care for patients with cancer (‘more than 2 years of experience with oncology patients, were skilled according to the ward nurses and agreed to participate in the study’) |
| Shidhaye 2019  | India   | ‘The aims of this paper are: (a) to provide quantitative measures of outputs related to implementation processes; (b) to describe the role of con-textual factors that facilitated and impeded implementation processes; and (c) to discuss what has been learned from the MHCP implementation.’                   | <b>Process Evaluation</b> – Mixed methods                                                   | The program for improving mental health care (PRIME) - comprehensive mental healthcare plan (MHCP) [...] | ‘The primary outcomes of PRIME were to improve demand for mental health services at the population/community level, reduce the‘missed opportunity’ at the health-facility level by improving detection of depression and AUD and provide evidence-based ser-vices to individuals with priority mental disorders (depression,AUD and psychosis)’ | Patients with depression, alcohol use disorder, and psychosis | Mental health case managers, medical officers, and community health workers                                                                                                                                     |

| Study              |               |                                                                                                                                                                                                                                                                                                 |                                                                       | Complex intervention (CI)                                                           |                                                                                                                                                                                                                                                                                                                       |                                                                                                                  |                                                                                                  |
|--------------------|---------------|-------------------------------------------------------------------------------------------------------------------------------------------------------------------------------------------------------------------------------------------------------------------------------------------------|-----------------------------------------------------------------------|-------------------------------------------------------------------------------------|-----------------------------------------------------------------------------------------------------------------------------------------------------------------------------------------------------------------------------------------------------------------------------------------------------------------------|------------------------------------------------------------------------------------------------------------------|--------------------------------------------------------------------------------------------------|
| Author date        | Country       | Study Aim/objective                                                                                                                                                                                                                                                                             | Study design                                                          | CI Name                                                                             | CI Aim                                                                                                                                                                                                                                                                                                                | Target population                                                                                                | Providers                                                                                        |
| Silies 2022        | Germany       | “Objectives of the process evaluation were to determine: [1] whether the intervention was implemented as planned, [2] which change mechanisms were observed, [3] whether targeted process outcomes were achieved and [4] in which way contextual factors influenced the implementation process” | <b>Process Evaluation</b><br>Mixed methods approach embedded in a RCT | Advance care planning in care dependent community-dwelling older persons (STADPLAN) | Train nurses to discuss advance care planning (medical care that are coherent with values, goals, and preferences)                                                                                                                                                                                                    | Patients had to be at least 60 years old and care-dependent classified by the German statutory health insurance. | Nurse facilitators (nurses in home care services)                                                |
| Sprange 2021       | UK            | ‘This paper describes the fidelity assessment conducted for the Lifestyle Matters study and presents the findings from analysis of facilitator training and supervision, intervention delivery and receipt.’                                                                                    | <b>Process Evaluation</b> – Mixed methods embedded in a RCT           | Lifestyle Matters                                                                   | ‘The Lifestyle Matters intervention was designed to assist older people to improve and sustain mental well-being through participation in meaningful activity. The aim is to enable participants to engage in both new and neglected activities through a mix of facilitated group meetings and individual sessions.’ | Community living older adults (65+)                                                                              | Facilitators from a healthcare or social care professional background                            |
| Svenningss on 2019 | Sweden        | ‘The aim of the present study was to evaluate the process of implementing care managers in collaborative care for patients with depression in Swedish primary health care in the PRIM-CARE RCT’                                                                                                 | <b>Process Evaluation- Qualitative</b> research embedded in a RCT     | PRIM-CARE RCT                                                                       | ‘To increase accessibility and continuity in care for people with depression in primary care’                                                                                                                                                                                                                         | People with depression or depressive symptoms                                                                    | Staff of primary care centers: registered nurses working as care managers and general physicians |
| Whitley 2009       | United States | ‘[...] to examine which factors, promote or hinder successful implementation of illness management and recovery [...] in various community mental health centers                                                                                                                                | <b>Process Evaluation- Mixed methods</b>                              | Illness and recovery management program                                             | ‘The intervention program is providing psychoeducation to improve understanding about mental illness and treatment. Important aspects of the                                                                                                                                                                          | People with severe mental illness                                                                                | Community mental health care teams                                                               |

| Study                                            |         |                     |              | Complex intervention (CI)                                                                                                                                   |        |                   |           |
|--------------------------------------------------|---------|---------------------|--------------|-------------------------------------------------------------------------------------------------------------------------------------------------------------|--------|-------------------|-----------|
| Author date                                      | Country | Study Aim/objective | Study design | CI Name                                                                                                                                                     | CI Aim | Target population | Providers |
| across the United States over a two-year period' |         |                     |              | program are the emphases on helping clients set personally meaningful goals for recovery and a strong therapeutic alliance aimed at achieving these goals.' |        |                   |           |



Table 2. Description of the role of external facilitators for each complex intervention

| CI name<br>(Author date)                                                                                                                                    | Whom play the role of external<br>facilitators                                                                                            | For whom                                                                                                                                                                                                                                                                            | Supported processes                  | Example of external facilitation activities                                                                                                                                                                                                                                                                                                                                                                           |
|-------------------------------------------------------------------------------------------------------------------------------------------------------------|-------------------------------------------------------------------------------------------------------------------------------------------|-------------------------------------------------------------------------------------------------------------------------------------------------------------------------------------------------------------------------------------------------------------------------------------|--------------------------------------|-----------------------------------------------------------------------------------------------------------------------------------------------------------------------------------------------------------------------------------------------------------------------------------------------------------------------------------------------------------------------------------------------------------------------|
| Cognitive Orientation to<br>daily Occupational<br>Performance (CO-OP)<br>(Allen 2019, Hunt 2021)                                                            | CO-OP KT research team<br>members                                                                                                         | CI providers (Interprofessional<br>teams of stroke rehabilitation<br>clinicians: nurses, occupational<br>therapists, physical therapists,<br>speech language pathologists,<br>and other disciplines)                                                                                | Clinical care (practice<br>delivery) | “Included a 2-day training workshop with<br>interprofessional teams [...] to establish the theory<br>and application of the CO-OP Approach in clinical<br>practice”                                                                                                                                                                                                                                                   |
|                                                                                                                                                             | Co-op expert-level facilitators                                                                                                           |                                                                                                                                                                                                                                                                                     | Change management                    |                                                                                                                                                                                                                                                                                                                                                                                                                       |
|                                                                                                                                                             |                                                                                                                                           |                                                                                                                                                                                                                                                                                     | Knowledge/research<br>management     | “The implementation facilitators visited each site<br>six times, and provided off-site telephone and<br>email support between visits.”                                                                                                                                                                                                                                                                                |
| The TRANSIT program<br>to prevent cardiovascular<br>disease (Bareil 2015,<br>Lessard 2016)                                                                  | A clinical nurse with a master's<br>degree in health administration<br>and a pharmacist with broad<br>experience in project<br>management | CI providers (Interprofessional<br>facilitation teams including at<br>least one physician, one nurse,<br>one pharmacist, one<br>nutritionist, kinesiologist, or<br>psychologist)                                                                                                    | Clinical care (practice<br>delivery) | “Focus group was held to determine the state of<br>CO-OP adoption approximately 3 months after the<br>implementation support period had ended.”<br>“[...] researchers (CB and JG) provided EFs with<br>training on facilitation, change management,<br>project management, PDSA methodology,<br>interprofessional collaboration, primary care<br>services in clinics, Chronic CareModel, and the<br>TRANSIT program.” |
|                                                                                                                                                             |                                                                                                                                           |                                                                                                                                                                                                                                                                                     | Change management                    |                                                                                                                                                                                                                                                                                                                                                                                                                       |
|                                                                                                                                                             | Research team members (n = 2)                                                                                                             |                                                                                                                                                                                                                                                                                     | Knowledge/research<br>management     |                                                                                                                                                                                                                                                                                                                                                                                                                       |
| The STOP&WATCH;<br>ISBAR (Introduction,<br>Situation, Background,<br>Assessment,<br>Recommendation);INTER<br>CARE nurse (coaching<br>nurse) (Basinska 2022) | Research team members                                                                                                                     | Clinical supervisors<br>(INTERCARE nurses are<br>trained registered nurses with<br>at least<br>3 years’ nursing home (NH)<br>experience are recruited and<br>employed by<br>each NH to deliver at least 24<br>h/week on-site clinical care,<br>coaching and support per 80<br>beds) | Change management                    | “Bi-monthly implementation meetings (2h)<br>between the nursing home leadership and the<br>research group to support and reflect on the<br>intervention elements’ implementation, and to<br>provide information.”                                                                                                                                                                                                     |
|                                                                                                                                                             |                                                                                                                                           |                                                                                                                                                                                                                                                                                     | Knowledge/research<br>management     |                                                                                                                                                                                                                                                                                                                                                                                                                       |

| CI name<br>(Author date)                                                                                                                                           | Whom play the role of external<br>facilitators                                                                                                                                                                   | For whom                                                                                                                                                                   | Supported processes                                        | Example of external facilitation activities                                                                                                                                                                                                                                                                                                                                                                    |
|--------------------------------------------------------------------------------------------------------------------------------------------------------------------|------------------------------------------------------------------------------------------------------------------------------------------------------------------------------------------------------------------|----------------------------------------------------------------------------------------------------------------------------------------------------------------------------|------------------------------------------------------------|----------------------------------------------------------------------------------------------------------------------------------------------------------------------------------------------------------------------------------------------------------------------------------------------------------------------------------------------------------------------------------------------------------------|
| Managers (Nursing directors)                                                                                                                                       |                                                                                                                                                                                                                  |                                                                                                                                                                            |                                                            |                                                                                                                                                                                                                                                                                                                                                                                                                |
| PACE-Lift and PACE-UP2 national trainers with practice to improve physical nurse training activities (Beighton 2015) experience/Behaviour change technique experts |                                                                                                                                                                                                                  | CI Providers (12 practice nurses)                                                                                                                                          | Clinical care (practice delivery)                          | “Nurses were in regular email contact with research assistants, and a sample of their consultations were audio-recorded to allow individual feedback from the BCT trainer.”                                                                                                                                                                                                                                    |
|                                                                                                                                                                    |                                                                                                                                                                                                                  |                                                                                                                                                                            | Knowledge/research management                              |                                                                                                                                                                                                                                                                                                                                                                                                                |
| The Journeying through Dementia intervention (Berry 2021)                                                                                                          | Research team members                                                                                                                                                                                            | CI providers (69 staff members within the local services)                                                                                                                  |                                                            | “One hour weekly supervision”<br><br>“Provide feedback by email to the 13 sites during the implementation”                                                                                                                                                                                                                                                                                                     |
|                                                                                                                                                                    | Senior professionals act as supervisors for the local staff                                                                                                                                                      |                                                                                                                                                                            | Clinical care (practice delivery)                          |                                                                                                                                                                                                                                                                                                                                                                                                                |
|                                                                                                                                                                    | Research team members (Clinical psychologists with experience of both delivering and supervising)                                                                                                                |                                                                                                                                                                            | Knowledge/research management                              |                                                                                                                                                                                                                                                                                                                                                                                                                |
| Fitness and Mobility Exercise (FAME) for patients after stroke (Bird 2020)                                                                                         | 2 Physical therapists                                                                                                                                                                                            | CI Providers (Fitness instructors who had to deliver the FAME program. They had experience in delivery of group classes of older adults but had no experience with stroke) | Clinical care (practice delivery)                          | “The content of each coaching session was determined by the workplace audit which took place a week before each of the coaching sessions.”                                                                                                                                                                                                                                                                     |
| The Mental Health Link intervention (Byng 2008)                                                                                                                    | Mental Health Link Facilitators ([...] actual work of the facilitator was designed to be explicitly flexible, responding to the context of primary care, specialist teams and health needs, but encouraging both | CI providers (General practitioners working in primary health care teams (PHCTs) and community mental health workers working in community mental health teams (CMHTs))     | Clinical care (practice delivery)<br><br>Change management | “Delivery of organizational change was dependent on three fixed components: training of facilitators, a toolkit and small financial incentives. The toolkit included: a guide through a series of meetings attended by representatives of both teams and service users; instructions for creating registers, carrying out audits and assessing educational needs; and a flexible template for a written shared |

| CI name<br>(Author date)                                                              | Whom play the role of external<br>facilitators                                                                                                                                                                                                                               | For whom                                                                                                                                    | Supported processes                                                    | Example of external facilitation activities                                                                                                                                                                                                                                                                                                                                                                                                                                                                                |
|---------------------------------------------------------------------------------------|------------------------------------------------------------------------------------------------------------------------------------------------------------------------------------------------------------------------------------------------------------------------------|---------------------------------------------------------------------------------------------------------------------------------------------|------------------------------------------------------------------------|----------------------------------------------------------------------------------------------------------------------------------------------------------------------------------------------------------------------------------------------------------------------------------------------------------------------------------------------------------------------------------------------------------------------------------------------------------------------------------------------------------------------------|
|                                                                                       | teams to develop shared care in line with the proposed model.”)                                                                                                                                                                                                              |                                                                                                                                             |                                                                        | care agreement between providers, detailing allocation of responsibilities and protocols for formal communication.”                                                                                                                                                                                                                                                                                                                                                                                                        |
| CHOICE program<br>(Cannon 2019)                                                       | Master’s level TA (technical assistance) provider (Provide facilitation according to the GTO manuals [facilitation intervention], offer support on-site, by phone or email during and before the intervention)                                                               | CI providers (Community-based practitioners)<br><br>Manager (Site leader (Boys & Girls Club leader) who supervised the CHOICE implementers) | Clinical care (practice delivery)<br><br>Change management             | “ GTO manuals, training, and onsite technical assistance to help practitioners complete implementation best practices specified by GTO (intervention) (i.e., GTO steps). During the first year, technical assistance providers helped the intervention group adopt, plan, and deliver CHOICE, and then evaluate and make quality improvements to CHOICE implementation using feedback reports summarizing their data.”                                                                                                     |
| Enhanced, EHR-facilitated Cancer Symptom (E2C2) Pragmatic Clinical Trial (Chlan 2021) | Research team members (“A PhD prepared nurse co-investigator, have the role of fidelity auditor. Monitoring the delivery of the intervention protocol. And a research team co-investigator who audit the calls between registered nurse symptom care manager and patients.”) | CI providers (Registered nurse symptom care manager [RN SCM])                                                                               | Clinical care (practice delivery)<br><br>Knowledge/research management | “ The first part of the E2C2 fidelity monitoring plan is focused on training activities for any nurse recruited for the RN SCM role. This includes formal training in institutional research practices, such as human subjects training; review of the trial protocol, which provides a detailed overview of the study approach, the evidence behind the intervention, and the research methods; and attendance at training sessions developed for the clinical champions in each of the medical oncology trial settings.” |
| Partner in Balance (An evidence-based eHealth intervention) (Christie 2020)           | Research team members and the Partner in Balance implementation team                                                                                                                                                                                                         | CI providers (Partner in Balance coaches - clinicians)                                                                                      | Clinical care (practice delivery)<br><br>Knowledge/Research management | “The coaches are required to take part in a 2-hour Partner in Balance training course, were the intervention is presented and the coaches take part in various teaching exercise.”                                                                                                                                                                                                                                                                                                                                         |
| London Stroke Training Course (LSCTC) (Clarke 2013)                                   | Original LSCTC staff (clinical experts who trained the change champions)                                                                                                                                                                                                     | CI providers (Change champions from a multidisciplinary team: Senior, experienced therapists and                                            | Clinical care (practice delivery)                                      | “ To prepare teams to deliver the LSCTC in 18 intervention units across four regions two full-day workshops were held (one month apart) for two or three representatives from each unit. These MDT members volunteered to undertake initial training                                                                                                                                                                                                                                                                       |

| CI name<br>(Author date)                                                                                                      | Whom play the role of external<br>facilitators                                                                                                                                                                                 | For whom                                                                                                                                                                                                                                        | Supported processes                                                                            | Example of external facilitation activities                                                                                                                                                                                                                                                                                                                                                                                                                                                                                                                                                                                                                                                                                                                                |
|-------------------------------------------------------------------------------------------------------------------------------|--------------------------------------------------------------------------------------------------------------------------------------------------------------------------------------------------------------------------------|-------------------------------------------------------------------------------------------------------------------------------------------------------------------------------------------------------------------------------------------------|------------------------------------------------------------------------------------------------|----------------------------------------------------------------------------------------------------------------------------------------------------------------------------------------------------------------------------------------------------------------------------------------------------------------------------------------------------------------------------------------------------------------------------------------------------------------------------------------------------------------------------------------------------------------------------------------------------------------------------------------------------------------------------------------------------------------------------------------------------------------------------|
| Collaborative Chronic<br>care model (CCM)<br>(Connolly 2020)                                                                  | 3 research team members with<br>expertise in the CCM and had<br>completed a structured intensive<br>facilitation training (health<br>services researchers, health<br>systems engineer, clinical<br>psychologist, psychiatrist) | nurses with the necessary skills<br>to deliver caregiver training)<br>11 internal facilitators (site<br>treatment team member) and<br>CI providers (interdisciplinary<br>treatment team within the<br>general mental health clinic in<br>medic) | Clinical care (care delivery)<br><br>Change management<br><br>Knowledge/research<br>management | and then cascade training to MDT members in<br>their own units.”<br>“ At each site, EFs completed a pre-site visit<br>assessment; a 1.5-day kickoff site visit; 6 months<br>of weekly video conferences or phone calls with<br>the treatment team and IF; weekly individual<br>meetings and ad hoc communications with the IF;<br>and 6 months of step-down facilitation activities<br>on an as-needed basis. EFs guided the<br>implementation process with a structured<br>workbook aligned with the elements of the CCM,<br>allowing IFs to engage in assessment and<br>undertake process redesign based on goals<br>identified within their team (e.g., to increase<br>patient involvement during treatment planning; to<br>improve communication with other clinics).” |
| T3 (Triage, treatment, and<br>transfer of patient with<br>stroke in emergency) trial<br>clinical intervention<br>(Craig 2017) | Research team members                                                                                                                                                                                                          | Senior healthcare professionals<br>working in emergency or in<br>stroke units (clinical experts)                                                                                                                                                | Change management<br><br>Knowledge/research<br>management                                      | “ One barrier and enabler multidisciplinary<br>workshop (1-h duration) was conducted at each of<br>the thirteen T3Trial for 2 months. The workshop<br>participants were asked to nominate specific<br>barriers for each of the behaviours and specific<br>enablers and strategies that could be used to<br>overcome the barriers. Thirteen workshops were<br>conducted with 105 staff from 13 hospitals.<br>Workshop group size ranged from minimum of<br>five participants to maximum of 11 participants.”                                                                                                                                                                                                                                                                |
| RE-Turn to work After<br>stroKE (RETAKE) Trial<br>(Craven 2021)                                                               | 6 mentors (experts with<br>substantial experience delivering<br>VR to stroke and/or acquired<br>brain injury patients)<br><br>Research team members                                                                            | CI providers (41 occupational<br>therapists)<br><br>Mentors                                                                                                                                                                                     | Clinical care (practice<br>delivery)<br><br>Knowledge/research<br>management                   | “All mentors received training in the RETAKE<br>mentoring process, potential sources of<br>contamination between trial arms and how to<br>reduce contamination risks, and how to use<br>teleconferencing to deliver mentoring.”<br><br>“Following initial intervention training, monthly<br>group mentoring sessions are provided for all OTs                                                                                                                                                                                                                                                                                                                                                                                                                              |

| CI name<br>(Author date)                                                                                                                             | Whom play the role of external<br>facilitators                 | For whom                                                                                                                                              | Supported processes                                        | Example of external facilitation activities                                                                                                                                                                                                                                                                                                                                                                                                                                                                                                                                                                                                                                                                                                   |
|------------------------------------------------------------------------------------------------------------------------------------------------------|----------------------------------------------------------------|-------------------------------------------------------------------------------------------------------------------------------------------------------|------------------------------------------------------------|-----------------------------------------------------------------------------------------------------------------------------------------------------------------------------------------------------------------------------------------------------------------------------------------------------------------------------------------------------------------------------------------------------------------------------------------------------------------------------------------------------------------------------------------------------------------------------------------------------------------------------------------------------------------------------------------------------------------------------------------------|
|                                                                                                                                                      |                                                                |                                                                                                                                                       |                                                            | via teleconference or Microsoft Teams. Attendees at each session included a mentor and OTs across two trial sites. Following each session, mentors completed an electronic mentoring record recording date and duration of the session, OT attendance (including reasons for non-attendance), issues and actions relating to RETAKE OTs, clinical matters, implementation of the intervention, and trial process issues. OTs could contact their mentors via phone, text or email for ad-hoc support outside of sessions; mentors recorded ad-hoc conversations via mentoring records or emails.”                                                                                                                                             |
| PREVENT (The Protocol the PREVENT nurse trained in guided Rapid Evaluation of Veterans Experiencing New Transient Neurologic Symptoms) (Damush 2021) | Lean Six Sigma methodology and quality management              | CI providers (Multidisciplinary staff members)<br><br>Facility QI teams and champions (staff from neurology, nursing, pharmacy, and systems redesign) | Clinical care (practice delivery)<br><br>Change management | “The site team members, and especially the champions, regularly contacted the EF who provided information, support, and encouragement across a broad range of topics.”<br><br>“The EF also worked with teams to implement a patient identification tool to identify patients with TIA who were cared for in the ED or in patient setting. This tool was used at some sites to prospectively ensure that patients received needed elements of care and at other sites to retrospectively identify opportunities for improvement. Given that many of the champions were clinicians without prior QI experience, the EF was able to help connect clinicians with local clinical informatics staff to implement the patient identification tool.” |
| The Carer Support Needs Assessment Tool (CSNAT) (Diffin 2018)                                                                                        | External facilitators (EFs) who were members of the CSNAT team | CI providers (Site champions/internal facilitators: clinical nurse specialists, social workers, head of overall                                       | Clinical care (practice delivery)<br><br>Change management | “ EFs support IFs with the following activities: Reflection on their organisation’s ethos or mission statement (often highlights they ae are there for the carers/family/friends of the patient); Considering                                                                                                                                                                                                                                                                                                                                                                                                                                                                                                                                 |

| CI name<br>(Author date)                                                             | Whom play the role of external<br>facilitators                                                                                                                   | For whom                                                                                                           | Supported processes               | Example of external facilitation activities                                                                                                                                                                                                                                                                                                                                                                           |
|--------------------------------------------------------------------------------------|------------------------------------------------------------------------------------------------------------------------------------------------------------------|--------------------------------------------------------------------------------------------------------------------|-----------------------------------|-----------------------------------------------------------------------------------------------------------------------------------------------------------------------------------------------------------------------------------------------------------------------------------------------------------------------------------------------------------------------------------------------------------------------|
|                                                                                      | Research team members                                                                                                                                            | service/managers, senior hospice at home practitioner, occupational therapist, carer support lead)                 | Knowledge/research management     | how they currently became aware of carer support needs; Planning for how they could use the CSNAT intervention in their individual practice; Making an initial ‘implementation plan’ for their service to include thinking about how to use the intervention within the service, where to record data on carers, format of CSNAT documentation, and how they could deliver training to and support their colleagues.” |
| Optimized Suicide Prevention and Implementation in Europe: OSPI-Europe (Harris 2013) | Research team members (Process evaluation team)                                                                                                                  | CI providers (health care professionals)                                                                           | Clinical care (practice delivery) | “[...] the suicide awareness and prevention training provided by OSPI includes a ‘train the trainer’ component. This involves providing training to key professionals that they can then roll out more widely within their respective organisations.”                                                                                                                                                                 |
|                                                                                      |                                                                                                                                                                  | Local advisory groups (n=4) (Internal facilitator)                                                                 | Change management                 |                                                                                                                                                                                                                                                                                                                                                                                                                       |
|                                                                                      |                                                                                                                                                                  | Local researchers (Internal facilitator)                                                                           | Knowledge/research management     |                                                                                                                                                                                                                                                                                                                                                                                                                       |
| PACE Steps to Success program (Hockley 2019)                                         | 16 country trainers                                                                                                                                              | PACE coordinators: qualified nurses senior care assistants                                                         | Clinical care (practice delivery) | “Examples of high level support and facilitation included: monthly internet-based international groups for country trainers and mentorship from national research leaders. Country trainers then supported the nursing home PACE coordinators by visiting each nursing home every 7–10 days”                                                                                                                          |
|                                                                                      | International experts (had diverse professional backgrounds including seven nurses, four physicians, three psychologists, one social worker and one sociologist) | (trained by country trainers) who facilitate in-house and coordinate the local implementation of the intervention. | Knowlegde/research management     |                                                                                                                                                                                                                                                                                                                                                                                                                       |
|                                                                                      | Research team members (leaders)                                                                                                                                  | Country trainers trained by international experts (CI providers)                                                   |                                   |                                                                                                                                                                                                                                                                                                                                                                                                                       |
| Share decision making aid (DA) for patient with Lupus (Karabukayeva 2022)            | Research team members                                                                                                                                            | CI providers (Rheumatology clinic personnel including clinic managers)                                             | Clinical care (practice delivery) | “All clinics used standardized implementation strategies that were provided uniformly by the research team (e.g., training on use of DA, designation of a clinic champion and refresher training course)”                                                                                                                                                                                                             |
|                                                                                      |                                                                                                                                                                  |                                                                                                                    | Knowledge/research management     |                                                                                                                                                                                                                                                                                                                                                                                                                       |

| CI name<br>(Author date)                                                      | Whom play the role of external<br>facilitators                                                                                              | For whom                                                                                                                                   | Supported processes                                | Example of external facilitation activities                                                                                                                                                                                                                                                                                                                                                                              |
|-------------------------------------------------------------------------------|---------------------------------------------------------------------------------------------------------------------------------------------|--------------------------------------------------------------------------------------------------------------------------------------------|----------------------------------------------------|--------------------------------------------------------------------------------------------------------------------------------------------------------------------------------------------------------------------------------------------------------------------------------------------------------------------------------------------------------------------------------------------------------------------------|
| Dementia Care Mapping™ (DCM)<br>(Kelley 2020)                                 | 6 team of external DCM expert mappers                                                                                                       | CI providers/mappers (staff members working with people living with dementia in home care)                                                 | Clinical care (practice delivery)                  | “Each expert mapper provided practical support to mappers in several homes, in person and via email/telephone, to support standardised implementation across intervention homes. Further implementation support included the provision of standardised paperwork and reporting templates, sending text message reminders and paperwork ahead of each cycle, and ongoing telephone support from a DCM intervention lead.” |
|                                                                               | Research team members                                                                                                                       | Care home managers                                                                                                                         | Knowledge/research management                      |                                                                                                                                                                                                                                                                                                                                                                                                                          |
|                                                                               |                                                                                                                                             |                                                                                                                                            |                                                    |                                                                                                                                                                                                                                                                                                                                                                                                                          |
| REFOCUS (Recovery, Psychosis and Forensic teams) Intervention<br>(Leamy 2014) | Personal recovery trainers                                                                                                                  | CI providers (Practitioner and team level in mental health) and managers                                                                   | Clinical care (practice delivery)                  | “[...] separate information sessions for staff and service users; personal recovery training (10.5 hours); coaching and working practice training (14.5 hours); team manager reflection sessions focused on team culture (3 hours externally facilitated by the Personal Recovery trainer); and whole team reflection sessions (3 hours externally facilitated)”                                                         |
|                                                                               |                                                                                                                                             | Service users                                                                                                                              |                                                    |                                                                                                                                                                                                                                                                                                                                                                                                                          |
| Asthma shared decision-making (SDM) (Ludden 2019)                             | Research team member (a trained facilitator)                                                                                                | CI providers (A core team, typically consisting of a provider champion, practice manager, health coach, nurse(s), and registration staff.” | Clinical care (practice delivery)                  | “Each week a trained facilitator from the research team held hour long meetings at the practice”                                                                                                                                                                                                                                                                                                                         |
|                                                                               |                                                                                                                                             |                                                                                                                                            | Change management<br>Knowledge/research management | “With a new training topic each week including: asthma SDM toolkit training, asthma appropriate care and action plans, population management, logistics of scheduling, and patient recruitment. The facilitator assisted the practice in adapting the toolkit into a version that suited their specific needs.”                                                                                                          |
| 5As Team (5AsT) (Luig 2018)                                                   | Research team members (Interdisciplinary researchers including family medicine, obesity experts, epidemiology, anthropology, public health, | Clinical champion (a front-line PCN dietician)                                                                                             | Clinical care (practice delivery)                  | “Debriefing, trouble shooting and feedback”                                                                                                                                                                                                                                                                                                                                                                              |
|                                                                               |                                                                                                                                             | Primary care network clinician trained in practice facilitation                                                                            | Change management                                  | “Intervention team providers received a 6-month intervention cocreated with the PCN Primary Care Network based on their self-assessed needs. The intervention included biweekly interactive lectures on topics identified by participants, followed by                                                                                                                                                                   |

| CI name<br>(Author date)                                                                                                                                                                                            | Whom play the role of external<br>facilitators                                                                                                             | For whom                                                                                                                                                                                     | Supported processes                                                | Example of external facilitation activities                                                                                                                                                                                                                                                                                                                                   |
|---------------------------------------------------------------------------------------------------------------------------------------------------------------------------------------------------------------------|------------------------------------------------------------------------------------------------------------------------------------------------------------|----------------------------------------------------------------------------------------------------------------------------------------------------------------------------------------------|--------------------------------------------------------------------|-------------------------------------------------------------------------------------------------------------------------------------------------------------------------------------------------------------------------------------------------------------------------------------------------------------------------------------------------------------------------------|
| Assertive community treatment model for persons with severe mental illness who have a recent history of psychiatric hospitalizations, criminal justice involvement, homelessness, or substance abuse (Mancini 2009) | organization clinical and executive management, and a front-line dietician).                                                                               | CI providers (Interdisciplinary care team: 7 mental health care workers, 7 registered dietitians, and 15 registered nurses or nurse practitioners)                                           | Knowledge/research management                                      | facilitated learning collaborative sessions where team members shared best practices, considered logistic and clinical challenges, and created individual practice improvement goals.”                                                                                                                                                                                        |
|                                                                                                                                                                                                                     | Graphic Designer (co-creation of tools)<br>Expert speakers (clinical experts)<br>Consultant-trainers (offers extensive training in the field for the team) | CI providers (The team includes at least a psychiatrist, a nurse, a substance abuse treatment specialist, and another clinician with experience treating persons with severe mental illness) | Clinical care (practice delivery)                                  | “Each program was assigned a consultant-trainer. In the first year, teams received intensive two-day training, monthly on-site visits, and periodic communication by e-mail and phone from the consultant-trainer. The consultant-trainer made less frequent visits and contacts in the second year, and the consultation was gradually phased out between months 18 and 24.” |
| COping with persistent Pain, Effectiveness Research into Self-management (COPERS) (Mars 2013)                                                                                                                       | Research team members                                                                                                                                      | CI providers (Trained facilitators, one a healthcare professional and another a lay facilitator with experience of living with long-term pain)                                               | Clinical care (practice delivery)<br>Knowledge/research management | “The course manual outlines the informational content of this component, as well as the structure, sequence, timing and mode of delivery of the various elements to be used by the facilitators.”                                                                                                                                                                             |
| Parwarish for reducing harsh parenting and violence within parents and adolescents from disadvantage communities (Mathias 2022)                                                                                     | Trainers from parenting for lifelong health (PHL)-Teens South Africa                                                                                       | Local coach (A coach was appointed and trained for each location and took responsibility for recruiting facilitators as well as training and coaching facilitators)                          | Clinical care (practice delivery)<br>Knowledge/research management | “Trainers from PLH-Teens South Africa facilitated a 10-day course for Parwarish facilitators and a 3-day training for coaches [...]”                                                                                                                                                                                                                                          |
|                                                                                                                                                                                                                     | Research team members and implementation team /Emmanuel hospital association (EHA) community health and development programme team                         | CI providers/Community facilitators (Facilitated 14 Parwarish modules with groups                                                                                                            |                                                                    | “A fort nightly coach- the- coaches meeting was led online with someone from PLH- Teens South Africa.”                                                                                                                                                                                                                                                                        |



| CI name<br>(Author date)                      | Whom play the role of external<br>facilitators                                             | For whom                                                                                                                                                                                                                                                               | Supported processes                                                                             | Example of external facilitation activities                                                                                                                                                                                                                                                                                                                                                                          |
|-----------------------------------------------|--------------------------------------------------------------------------------------------|------------------------------------------------------------------------------------------------------------------------------------------------------------------------------------------------------------------------------------------------------------------------|-------------------------------------------------------------------------------------------------|----------------------------------------------------------------------------------------------------------------------------------------------------------------------------------------------------------------------------------------------------------------------------------------------------------------------------------------------------------------------------------------------------------------------|
|                                               |                                                                                            | of parents and teens with meetings of 1.5-2 hours and encouraged participants to complete the weekly activity to try at home, for example, family eats dinner together)                                                                                                |                                                                                                 |                                                                                                                                                                                                                                                                                                                                                                                                                      |
|                                               |                                                                                            | Project officer ([...] at each research location, responsible for research components of the project and supported baseline and endline data collection as well as monitoring and evaluation of Parwarish sessions with other EHA community coordinators in the team") |                                                                                                 |                                                                                                                                                                                                                                                                                                                                                                                                                      |
| Centering pregnancy Plus (CP+) (Norvick 2015) | Research team members (research staff actively engaged in implementation across all sites) | Champion program cooordinators (“They “proselytized” about CP+, promoted teamwork, facilitated groups, lobbied administrators for funds, and wrote grants and received funding.”)                                                                                      | Clinical care (practice delivery)<br><br>Change management<br><br>Knowledge/research management | “In phase 1, immediate implementation sites received CP+ training workshops, some consultation, in-services, and grand rounds, and some material resources over approximately three months (implementation support); support from study staff to the immediate implementation sites was substantially decreased in phase 2 and consisted of limited ongoing consultation (minimal implementation support).”<br><br>. |
|                                               |                                                                                            | CI providers (14 clinical site staff: 2 administrators, 4 obstetricians, 3 nurse midwives, 1 registered nurse, 3 social workers, and 1 dietician. Six of them facilitated the intervention CP+ groups)                                                                 |                                                                                                 |                                                                                                                                                                                                                                                                                                                                                                                                                      |

| CI name<br>(Author date)                                                                                                                                       | Whom play the role of external<br>facilitators                                                                                                                                 | For whom                                                                                                                                                                                                                                  | Supported processes                  | Example of external facilitation activities                                                                                                                                                                                                                                                                                                                                                                                                                                                             |
|----------------------------------------------------------------------------------------------------------------------------------------------------------------|--------------------------------------------------------------------------------------------------------------------------------------------------------------------------------|-------------------------------------------------------------------------------------------------------------------------------------------------------------------------------------------------------------------------------------------|--------------------------------------|---------------------------------------------------------------------------------------------------------------------------------------------------------------------------------------------------------------------------------------------------------------------------------------------------------------------------------------------------------------------------------------------------------------------------------------------------------------------------------------------------------|
| Managing Osteoarthritis<br>in Consultations<br>(MOSAICS) (Porcheret<br>2014)                                                                                   | Academic rheumatologist who<br>led and interactive session<br>(clinical expert)                                                                                                | CI providers (“[...] all the GPs,<br>practices nurses, and<br>administrative staff working in<br>the four practices randomised<br>to the intervention arm of the<br>MOSAICS study”)                                                       | Clinical care (practice<br>delivery) | Analysis of performance, target group and setting:<br>“The advisory groups [...] were asked about: i)<br>their current management of OA, ii) their<br>awareness of, and agreement with, the NICE OA<br>Guideline, and iii) any gaps perceived between<br>their current practice and that recommended by<br>NICE and in the model consultation. In addition,<br>they were asked to suggest which barriers and/or<br>incentives might be relevant to implementing the<br>model consultation in practice.” |
|                                                                                                                                                                | Research team members and<br>educational advisors                                                                                                                              |                                                                                                                                                                                                                                           | Change management                    |                                                                                                                                                                                                                                                                                                                                                                                                                                                                                                         |
|                                                                                                                                                                | Workshop facilitators<br>(experienced GP<br>educators/opinion leaders who<br>delivered the behaviour change<br>intervention at general practices<br>premises in four sessions) | Practice advisory groups (“[...]<br>consisting of GP with research<br>or teaching roles and one<br>consisting of members of the<br>primary healthcare team in a<br>local general practice, they<br>gave feedback and were<br>consultant”) | Knowledge/research<br>management     |                                                                                                                                                                                                                                                                                                                                                                                                                                                                                                         |
| EvANtiPain - self-<br>management support<br>intervention for oncology<br>patients (Raphaelis 2020)                                                             | Research team member                                                                                                                                                           | CI providers (35 intervention<br>nurses were trained within 19<br>training sessions)                                                                                                                                                      | Clinical care (practice<br>delivery) | “For training, each designated intervention nurse<br>received a 1.5-h training session, detailed teaching<br>materials and a case-based coaching throughout<br>the study by the last author.”                                                                                                                                                                                                                                                                                                           |
|                                                                                                                                                                |                                                                                                                                                                                |                                                                                                                                                                                                                                           | Knowledge/research<br>management     |                                                                                                                                                                                                                                                                                                                                                                                                                                                                                                         |
| The program for<br>improving mental health<br>care (PRIME) -<br>comprehensive mental<br>healthcare plan (MHCP)<br>for patients with<br>depression, alcohol use | Research team members (The<br>PRIME team including data<br>manager, programme<br>coordinator, clinical<br>psychologist, programme<br>director, principal investigator)         | CI providers (The mental<br>health case managers, medical<br>officers, community health<br>workers)                                                                                                                                       | Clinical care (practice<br>delivery) | “The PRIME MHCP was developed using a<br>thorough situational analysis to understand the<br>local context, theory of change workshops to map<br>the outcomes framework for integration of mental<br>health in primary care [...]”                                                                                                                                                                                                                                                                       |
|                                                                                                                                                                |                                                                                                                                                                                |                                                                                                                                                                                                                                           | Change management                    |                                                                                                                                                                                                                                                                                                                                                                                                                                                                                                         |
|                                                                                                                                                                |                                                                                                                                                                                |                                                                                                                                                                                                                                           | Knowledge/research<br>management     |                                                                                                                                                                                                                                                                                                                                                                                                                                                                                                         |

| CI name<br>(Author date)                                                                                         | Whom play the role of external<br>facilitators                                                                                                                                                                                                                                                     | For whom                                                                                      | Supported processes                                                               | Example of external facilitation activities                                                                                                                                                                                                                                                                                                                                                                                                                                                                                                            |
|------------------------------------------------------------------------------------------------------------------|----------------------------------------------------------------------------------------------------------------------------------------------------------------------------------------------------------------------------------------------------------------------------------------------------|-----------------------------------------------------------------------------------------------|-----------------------------------------------------------------------------------|--------------------------------------------------------------------------------------------------------------------------------------------------------------------------------------------------------------------------------------------------------------------------------------------------------------------------------------------------------------------------------------------------------------------------------------------------------------------------------------------------------------------------------------------------------|
| disorder and psychosis<br>(Shidhaye 2019)                                                                        | Community advisory<br>board/external change agents<br>("[...]to engage community<br>representatives and leaders. The<br>overall objective was to take<br>their advice about various<br>PRIME activities,<br>especially community processes<br>to improve acceptability of<br>PRIME interventions") |                                                                                               |                                                                                   | "Case managers were trained for 9 days on<br>Healthy Activity Programme (HAP), Counselling<br>for Alcohol Problems (CAP), the counselling<br>relationship and psychoeducation (for psychosis).<br>In addition to these training days, additional<br>support was provided by the programme<br>coordinator and the clinical psychologist. They<br>conducted weekly supervision, 2 days quarterly<br>refresher-training sessions and facility-based<br>supervision."                                                                                      |
| Advance care planning in<br>care dependent<br>community-dwelling<br>older persons<br>(STADPLAN)<br>(Silies 2022) | Research team members and<br>trainers                                                                                                                                                                                                                                                              | CI providers (Nurse<br>facilitators)                                                          | Clinical care (practice<br>delivery)<br><br>Knowledge/research<br>management      | "2-day educational program: Day 1: ACP basics,<br>aim of the ACP conversations, practical training of<br>the conversation setting and topic guide; Day 2:<br>Reflection on experiences and refresher training<br>with case examples."<br><br>"In the planning of the process evaluation, we<br>defined the expertise and mode of collaboration<br>between the study centres with main responsibility<br>for process evaluation and intervention<br>development respectively."                                                                          |
| Lifestyle Matters for<br>community living older<br>adults (Sprange 2021)                                         | Research team members<br><br>Supervisors (2 experienced<br>occupational therapists)                                                                                                                                                                                                                | CI providers (4 facilitators<br>from a healthcare or social care delivery)<br><br>Supervisors | Clinical care (practice<br>care delivery)<br><br>Knowledge/research<br>management | "The research team members, trained the<br>facilitators and supervisors in a 2-day intensive<br>training course, assure that they are equip to<br>deliver the intervention."<br><br>"A protocol was created to enable provision of<br>consistent and appropriate supervision across and<br>within sites. Regular one-to-one supervision was<br>recommended on a weekly basis at a mutually<br>convenient time and place, preferably face-to-face<br>but with distance supervision being an option if<br>appropriate. Joint supervision was also deemed |

| CI name<br>(Author date)                                                                     | Whom play the role of external<br>facilitators                                                                                                                            | For whom                                                                                                            | Supported processes                                                    | Example of external facilitation activities                                                                                                                                                                                                                                                                                                                                                                                                                                                                                                                                                                                                                                                                                           |
|----------------------------------------------------------------------------------------------|---------------------------------------------------------------------------------------------------------------------------------------------------------------------------|---------------------------------------------------------------------------------------------------------------------|------------------------------------------------------------------------|---------------------------------------------------------------------------------------------------------------------------------------------------------------------------------------------------------------------------------------------------------------------------------------------------------------------------------------------------------------------------------------------------------------------------------------------------------------------------------------------------------------------------------------------------------------------------------------------------------------------------------------------------------------------------------------------------------------------------------------|
| PRIM-CARE RCT for people with depression or depressive symptoms (Svenningsson 2019)          | Research team members (Different professional background, prepared to provide support to the facilitators and primary care centers during the entire intervention period) | CI providers (11 care managers, and 29 general practitioners, working at the intervention site)<br><br>Facilitators | Clinical care (practice delivery)<br><br>Knowledge/research management | acceptable if the individual supervisory needs of facilitators had been met.”<br><br>“Initially, the research team visited every intervention PCC to inform the PCC manager, staff and the assigned care manager about the study and the care manager function and to discuss any issue.”<br><br>“The GPs, employed by the PCCs, were invited to a one-day session as part of their duties and the care managers were invited to a three-day training session before the start of the intervention.”<br><br>“Peer support meetings were offered to all care managers every second month. These support meetings provided opportunities to meet and discuss their experiences of care management and for jointly developing the care.” |
|                                                                                              | Four specially trained research nurses acted as facilitators for care managers                                                                                            | Primary care clinic (PCC) managers                                                                                  |                                                                        |                                                                                                                                                                                                                                                                                                                                                                                                                                                                                                                                                                                                                                                                                                                                       |
| Illness and recovery management program for people with severe mental illness (Whitley 2009) | Research team members (Supervised researcher/implementation monitor and central coordinating center)                                                                      | CI providers (Employee of community mental health centers)                                                          | Clinical care (practice delivery)<br><br>Knowledge/research management | “The first year involved the delivery of training by a consultant trainer, who conducted an initial one- or two-day workshop, followed by further training and consultation as requested.”<br><br>“Standardized instructions [...] regarding systematic observation of implementation efforts were designed and distributed by a central coordinating center (Dartmouth Psychiatric Research Center) to ensure rigor and comparability across sites. Each site had a supervised researcher (an implementation monitor) who functioned as an independent observer of implementation, documenting the process both qualitatively and quantitatively.”                                                                                   |
|                                                                                              | Consultant trainer                                                                                                                                                        |                                                                                                                     |                                                                        |                                                                                                                                                                                                                                                                                                                                                                                                                                                                                                                                                                                                                                                                                                                                       |
